# Supplementary material
Source: MDPI journal article supplement (https://www.mdpi.com/2673-4087/4/3/15)
Supplement: s1 [file s1]

**Supplementary Table S1:** Prevalence of *Toxoplasma gondii* infection in TBI according to sociodemographic characteristics.

| Characteristic               | Overall N = 160 | Negative N = 108 | Positive N = 52 | P-value |
|------------------------------|-----------------|------------------|-----------------|---------|
| <b>Age</b>                   | 32 (26, 39)     | 32 (27, 38)      | 30 (23, 39)     | 0.6     |
| <b>Gender</b>                |                 |                  |                 | 0.072   |
| Female                       | 16 (10%)        | 14 (13%)         | 2 (3.8%)        |         |
| Male                         | 144 (90%)       | 94 (87%)         | 50 (96%)        |         |
| <b>Profession</b>            |                 |                  |                 | 0.5     |
| Bike riders                  | 43 (27%)        | 28 (26%)         | 15 (29%)        |         |
| Employee in service          | 30 (19%)        | 21 (19%)         | 9 (17%)         |         |
| Manual workers               | 24 (15%)        | 16 (15%)         | 8 (15%)         |         |
| Others                       | 26 (16%)        | 15 (14%)         | 11 (21%)        |         |
| Student                      | 16 (10%)        | 10 (9.3%)        | 6 (12%)         |         |
| Unemployed                   | 21 (13%)        | 18 (17%)         | 3 (5.8%)        |         |
| <b>Classification of TBI</b> |                 |                  |                 |         |
| Mild                         |                 | 42 (39%)         | 24 (46%)        | 0.7     |
| Moderate                     |                 | 38 (35%)         | 17 (33%)        |         |
| Severe                       |                 | 28 (26%)         | 11 (21%)        |         |

Median (IQR); n (%) *Wilcoxon rank sum test*; *Pearson's Chi-squared test*

TBI: Traumatic brain injury
